# Supplementary material for: Effective recruitment of participants to a phase I study using the internet and publicity releases through charities and patient organisations: analysis of the adaptive study of IL-2 dose on regulatory T cells in type 1 diabetes (DILT1D)
Source: Trials. 2015 Mar 11;16:86. doi: 10.1186/s13063-015-0583-7 (PMC4369347; doi:10.1186/s13063-015-0583-7)
Supplement: Additional file 1: — DILT1D website referral groupings. Description: List of all study website referral sources and associated grouping category. [file 13063_2015_583_MOESM1_ESM.csv]

	group	website
0	direct	(direct) / (none)
1	search_engine	google / organic
2	Science_news	wired.co.uk / referral
3	JDRF	jdrf.org.uk / referral
4	Uoc/CUH	cam.ac.uk / referral
5	Facebook	m.facebook.com / referral
6	Facebook	facebook.com / referral
7	Wellcome Trust	wellcome.ac.uk / referral
8	Twitter	t.co / referral
9	Bioresource	cambridgebioresource.org.uk / referral
10	Other Soc Med	linkedin.com / referral
11	search_engine	bing / organic
12	Uoc/CUH	immunology.cam.ac.uk / referral
13	Diabetes blog/forum	Diabetes blog/forum.com / referral
14	Diabetes_UK	youngdiabetologists.org / referral
15	Trial Registers	clinicaltrials.gov / referral
16	Diabetes blog/forum	cureresearch4type1diabetes.blogspot.com / referral
17	Diabetes_UK	diabetessupport.co.uk / referral
18	Diabetes_UK	diabetes.org.uk / referral
19	Trial Registers	public.Trial Registers.org.uk / referral
20	Diabetes blog/forum	diabeticbanana.org / referral
21	Trial Registers	controlled-trials.com / referral
22	Uoc/CUH	cuh.org.uk / referral
23	Other	medicalxpress.com / referral
24	Diabetes blog/forum	cureresearch4type1diabetes.blogspot.co.uk / referral
25	Bioresource	bioresource.nihr.ac.uk / referral
26	Other	sawley / referral
27	Other Soc Med	connect / referral
28	Diabetes_UK	youngdiabetologists.org.uk / referral
29	Other	youtube.com / referral
30	Diabetes blog/forum	cureresearch4type1diabetes.blogspot.in / referral
31	Diabetes blog/forum	diabetes-support.org.uk / referral
32	Science_news	eurekalert.org / referral
33	Trial Registers	ukctg.nihr.ac.uk / referral
34	Uoc/CUH	cimr.cam.ac.uk / referral
35	Science_news	julesthorntrust.org.uk / referral
36	Diabetes blog/forum	procurediabetes.org / referral
37	search_engine	yahoo / organic
38	Trial Registers	address2.org / referral
39	Diabetes blog/forum	cureresearch4type1diabetes.blogspot.de / referral
40	Other	192.168.2.141 / referral
41	search_engine	google.co.uk / referral
42	Science_news	healthcanal.com / referral
43	Other	comcast / organic
44	Other	conduit / organic
45	Diabetes blog/forum	cureresearch4type1diabetes.blogspot.com.au / referral
46	Diabetes blog/forum	cureresearch4type1diabetes.blogspot.nl / referral
47	Diabetes blog/forum	cureresearch4type1diabetes.blogspot.sg / referral
48	search_engine	izito.co.uk / referral
49	search_engine	r.search.yahoo.com / referral
50	Science_news	scientistlive.com / referral
51	search_engine	start.speedbit.com / referral
52	search_engine	uk-mg6.mail.yahoo.com / referral
53	Trial Registers	admin.controlled-trials.com:81 / referral
54	search_engine	aol / organic
55	search_engine	ask / organic
56	search_engine	avg / organic
57	search_engine	babylon / organic
58	Other	barcoo.com / referral
59	direct	clinical-trials-type1-diabetes.org / referral
60	Diabetes blog/forum	cureresearch4type1diabetes.blogspot.ca / referral
61	Diabetes blog/forum	cureresearch4type1diabetes.blogspot.co.il / referral
62	Diabetes blog/forum	cureresearch4type1diabetes.blogspot.fi / referral
63	Diabetes blog/forum	cureresearch4type1diabetes.blogspot.fr / referral
64	Diabetes blog/forum	cureresearch4type1diabetes.blogspot.it / referral
65	Diabetes blog/forum	cureresearch4type1diabetes.blogspot.no / referral
66	Diabetes blog/forum	cureresearch4type1diabetes.blogspot.pt / referral
67	Diabetes blog/forum	cureresearch4type1diabetes.blogspot.ru / referral
68	Diabetes blog/forum	cureresearch4type1diabetes.blogspot.se / referral
69	Diabetes blog/forum	drn-cc.med.ic.ac.uk / referral
70	Other	epscomm.com / referral
71	search_engine	google.com / referral
72	Other	jobs.ac.uk / referral
73	Uoc/CUH	jobs.cam.ac.uk / referral
74	Other	localhost / referral
75	Other	localhost:53534 / referral
76	Other	nasa-stvar.hr:2095 / referral
77	search_engine	plus.url.google.com / referral
78	Other	r.duckduckgo.com / referral
79	search_engine	search.orange.co.uk / referral
80	search_engine	search.v9.com / referral
81	search_engine	search.whitesmoke.com / referral
82	Other	sogou.com / referral
83	Other	talktalk.co.uk / referral
84	search_engine	translate.google.co.in / referral
85	search_engine	translate.google.com.hk / referral
86	search_engine	translate.google.cz / referral
87	search_engine	translate.google.nl / referral
88	search_engine	translate.google.ru / referral
89	search_engine	uk-mg42.mail.yahoo.com / referral
90	search_engine	uk.zapmeta.com / referral
91	search_engine	us-mg5.mail.yahoo.com / referral
92	search_engine	us-mg6.mail.yahoo.com / referral
93	Other	webextract.profound.net / referral
94	Other	www2.inbox.com / referral
95	Other	www8.buyerpricer.com / referral
96	Other	yandex / organic
